# Supplementary material for: Scientific Advancements in Drug Development and Trials for Urothelial Carcinoma: Insights From the 2023 ASCO-GU Cancers Symposium
Source: PubMed Central journal article supplement (PMC10676780; doi:10.14336/ad.2023.0502), 2023-12-01
Supplement: AD-14-6-1953-s.pdf [file AD-14-6-1953-s.pdf]

SUPPLEMENTARY DATA

**Scientific Advancements in Drug Development and Trials  
for Urothelial Carcinoma: Insights From the 2023 ASCO-  
GU Cancers Symposium**

**Dechao Feng, Dengxiong Li, Ruicheng Wu, Ping Han**

# SUPPLEMENTARY DATA

**Supplementary Table 1.** Specifying novel agents and trials for UC.

| Author                     | Country       | Registration number  | Patients number | Medicine                                                                                  | Patient feature                                                                                                                                                      | Main end-points  | Main results                                                                                                                                                                                                                                                   |
|----------------------------|---------------|----------------------|-----------------|-------------------------------------------------------------------------------------------|----------------------------------------------------------------------------------------------------------------------------------------------------------------------|------------------|----------------------------------------------------------------------------------------------------------------------------------------------------------------------------------------------------------------------------------------------------------------|
| Matthew I. Milowsky et al. | International | LBA439 (NCT03288545) | 152             | EV vs EV+ pembrolizumab                                                                   | CI patients with la/mUC.                                                                                                                                             | QoL and symptoms | This study showed that EV+ pembrolizumab in cisplatin-ineligible patients with la/mUC was associated with preservation or improvement of QoL, functioning, and symptoms.                                                                                       |
| Matt D. Galsky et al.      | International | LBA440 (NCT02807636) | 851             | Atezolizumab + plt/gem vs placebo + plt/gem                                               | Patients with la/mUC                                                                                                                                                 | OS               | There was no difference in OS between the two groups.                                                                                                                                                                                                          |
| Aristotelis Bamias et al.  | International | LBA441 (NCT02807636) | 719             | Atezolizumab monotherapy vs placebo + plt/gem                                             | Patients with la/mUC                                                                                                                                                 | OS               | Only in the PD-L1–high mUC subgroup, patients accepted Atezolizumab monotherapy had better OS than those received placebo + plt/gem.                                                                                                                           |
| Andrea Necchi et al.       | International | LBA442 (NCT02625961) | 132             | Pembrolizumab (q3W) for ≤35 cycles                                                        | Patients with BCG-unresponsive HR non-muscle-invasive bladder cancer (NMIBC) with papillary tumors only (high grade Ta or any-grade T1) at baseline and ECOG PS 0-2. | DFS in 12 months | Results suggest patients with non-CIS papillary HR NMIBC unresponsive to BCG who declined or were ineligible to undergo RC may also benefit from pembrolizumab monotherapy.                                                                                    |
| Matt D. Galsky et al.      | International | LBA443 (NCT02632409) | 353             | Nivolumab (240 mg q2W) versus placebo                                                     | Patients with HR MIUC after radical resection.                                                                                                                       | DFS              | Nivolumab continued to show DFS benefits versus placebo.                                                                                                                                                                                                       |
| Matt D. Galsky et al.      | International | LBA447 (NCT03558087) | 76              | Four cycles of gemcitabine, cisplatin, plus nivolumab                                     | Patients with cisplatin-eligible with cT2-T4aN0M0 urothelial bladder cancer.                                                                                         | cCR              | Transurethral resection of bladder tumor followed by gemcitabine, cisplatin, plus nivolumab achieves stringently defined cCR in a substantial subset of patients with MIBC. ≥2-year bladder-intact survival is achieved in the majority of patients with a cCR |
| Jason Brown et al.         | International | LBA448 (NCT02365766) | 82              | CE group (gemcitabine +cisplatin +pembrolizumab) vs CI group (gemcitabine+ pembrolizumab) | Patients were surgical candidates with clinical stage T2-4aN0M0 MIUC.                                                                                                | DFS, OS          | Neoadjuvant chemoimmunotherapy demonstrated significant down staging in CE and CI MIUC pts prior to definitive surgery, meeting the primary endpoint. Survival correlated with pathologic response.                                                            |
| Yuki Endo et al.           | Japan         | Post session 452     | 70              | PCT +pembrolizumab                                                                        | Patients with mUC received PCT followed by pembrolizumab.                                                                                                            | OS               | This study reported that early introduction of pembrolizumab may be associated with longer OS in the patients with mUC who are resistant to chemotherapy.                                                                                                      |
| Lorenzo Antonuzzo et al.   | Italian       | LBA469 (NCT02603432) | 464             | Avelumab 800 mg every two weeks                                                           | Patients with locally advanced or metastatic urothelial carcinoma                                                                                                    | OS               | This study supports for avelumab as a standard of care in eligible pts                                                                                                                                                                                         |

# SUPPLEMENTARY DATA

|                             |                |                       |     |                                   |                                                                                                                      |              |                                                                                                                                                                                                      |
|-----------------------------|----------------|-----------------------|-----|-----------------------------------|----------------------------------------------------------------------------------------------------------------------|--------------|------------------------------------------------------------------------------------------------------------------------------------------------------------------------------------------------------|
| Philippe Barthelemy et al.  | France         | LBA471 (NCT04822350)  | 591 | Avelumab                          | without progression after PCT.<br>Patients with locally advanced urothelial carcinoma without progression after PCT. | OS           | with locally advanced or metastatic urothelial carcinoma.<br>The study confirms the clinical activity and acceptable safety profile of avelumab in a heterogeneous population                        |
| Soufyan Annakib et al.      | France         | LBA490 (NCT03584659)  | 39  | Pembrolizumab                     | Patients with la/mUC                                                                                                 | HRQoL        | HRQoL for la/mUC patients after first pembrolizumab infusion showed contradictory results with previous reports with a trend for HRQoL degradation after one treatment cycle.                        |
| AmarnathC hallapalli et al. | United Kingdom | LBA493 (NCT01616875)  | 26  | Cabazitaxel +cisplatin            | Patients with MIBC were included if fit to receive NAC and to undergo RC.                                            | PFS, OS      | Neoadjuvant cabazitaxel with cisplatin chemotherapy is an effective regimen with 65.4% patients alive and progression-free at 5 years.                                                               |
| Karim Chamie et al.         | USA            | LBA495 (NCT03022825)  | 86  | Nogapendekin alfa inbakicept+B CG | Patients with BCG-unresponsive CIS with or without Ta/T1 disease.                                                    | QoL          | QOL measurement supports good tolerability of the intravesical Nogapendekin alfa inbakicept plus BCG in BCG-unresponsive, high-grade NMIBC patients with CIS.                                        |
| Capucine Baldini et al.     | International  | LBA498 (NCT045613622) | 49  | BT8009                            | Patients with advanced malignancies.                                                                                 | Safety       | BT8009 was well tolerated and demonstrated promising preliminary antitumor activity                                                                                                                  |
| Peter H. O'Donnell et al.   | International  | LBA499 (NCT03288545)  | 149 | EV vs EV+ pembrolizumab           | CI patients with la/mUC.                                                                                             | ORR          | EV+ pembrolizumab showed promising ORR in CI patients with la/mUC.                                                                                                                                   |
| Andrea Necchi et al.        | International  | LBA501 (NCT04045613)  | 282 | Derazantinib 300 mg qd            | Patients with advanced mUC.                                                                                          | ORR          | Derazantinib showed signals of clinical activity in some patients with mUC and FGFR1-3 genetic aberrations but the observed ORR and PFS.                                                             |
| Guillermo de Velasco et al. | Spain          | LBA502 (NCT04602078)  | 82  | Atezolizumab                      | Patients with la/mUC considered unfit for full dose of PCT.                                                          | ORR, PFS, OS | Atezolizumab with split doses of PCT was safely administered in a population of frail patients with mUC who were unfit for PCT showing promising preliminary survival outcomes in terms of response. |
| James W.F.Catto et al.      | International  | LBA503 (NCT04172675)  | 10  | Erdafitinib 6 mg once daily       | Patients with BCG unresponsive HR NMIBC with FGFR3/2alt and CIS.                                                     | Safety       | Erdafitinib is efficacy in patients with HR-NMIBC with FGFRalt.                                                                                                                                      |
| Siamak Daneshmand et al.    | International  | LBA504 (NCT04172675)  | 10  | Erdafitinib 6 mg once daily       | Patients with BCG unresponsive HR NMIBC with intermediate-risk and FGFRalt, no CIS.                                  | CR           | This study demonstrates efficacy of erdafitinib in adult patients with intermediate-risk NMIBC with FGFRalt.                                                                                         |

# SUPPLEMENTARY DATA

|                                    |               |                           |     |                                                                           |                                                                                                  |                                               |                                                                                                                                                                                                                                                               |
|------------------------------------|---------------|---------------------------|-----|---------------------------------------------------------------------------|--------------------------------------------------------------------------------------------------|-----------------------------------------------|---------------------------------------------------------------------------------------------------------------------------------------------------------------------------------------------------------------------------------------------------------------|
| F.Johannes P. van Valenberg et al. | Netherlands   | LBA505 (NCT02720367)      | 12  | TAR-200                                                                   | Patients with a papillary recurrence after prior histologically proven, intermediate risk NMIBC. | Safety                                        | TAR-200 appears to be safe and well tolerated in patients with intermediate-risk NMIBC.                                                                                                                                                                       |
| Maha H. A. Hussain et al.          | International | LBA506 (NCT03854474)      | 24  | Tazemetostat 800 mg bid+ pembrolizumab 200 mg every 3 weeks               | Patients with cisplatin-refractory or cisplatin/chemo-ineligible advanced urothelial cancer.     | Making sure the recommended phase two dose OS | The recommended phase two dose for tazemetostat is 800 mg + 200 mg Pembrolizumab q 3 weeks.                                                                                                                                                                   |
| Srikala S. Sridhar et al.          | International | LBA508 (NCT02603432)      | 700 | Avelumab maintenance + best supportive care vs best supportive care alone | Patients with unresectable la/mUC that did not progress after accepting PCT.                     | OS                                            | Long-term follow-up confirms that avelumab maintenance provides similar OS and PFS benefits in patients with advanced UC who are progression free following standard-of-care cisplatin- or carboplatin-based chemotherapy, with an acceptable safety profile. |
| Fangning Wan et al.                | China         | LBA509 (ChiCTR2000032730) | 15  | Sintilimab 200 mg                                                         | Patients were cT2-T4 N0 MIBC and were considered eligible for RC.                                | Pathologic complete response                  | Neoadjuvant sintilimab was feasible and provided meaningful pathologic responses in patients with MIBC.                                                                                                                                                       |
| Zhiyong Li et al.                  | China         | LBA510 (ChiCTR2000035275) | 14  | Tislelizumab 200 mg                                                       | Patients with HR NMIBC BCG-unresponsive papillary tumors.                                        | DFS                                           | Our preliminary results supported the use of tislelizumab combined with radiotherapy as a promising bladder-preserving therapy for patients with BCG-unresponsive HR NMIBC who were ineligible for or refused RC.                                             |
| Gary D. Steinberg et al.           | Canada        | LBA512 (NCT04752722)      | 19  | EG-70                                                                     | Patients with BCG-unresponsive CIS NMIBC.                                                        | SD or CR                                      | These results demonstrate the safety, tolerability and durable therapeutic potential of intravesical EG-70 in patients with BCG-unresponsive CIS.                                                                                                             |
| David H Aggen et al.               | International | LBA517 (NCT04044859)      | 43  | ADP-A2M4CD8                                                               | Patients with advanced UC.                                                                       | Safety                                        | ADP-A2M4CD8 continues to show an acceptable benefit to UC.                                                                                                                                                                                                    |
| Rohit K. Jain et al.               | Orlando       | LBA521 (NCT04863885)      | 9   | Nivolumab+ Ipilimumab+ SG                                                 | Patients with CI mUC                                                                             | Safety                                        | The RP2D of SG was identified as 8mg/kg in combination with ipilimumab 3 mg/kg+ Nivolumab 1 mg/kg as first-line therapy for CI mUC.                                                                                                                           |
| Petros Grivas et al.               | International | LBA518 (NCT03547973)      | /   | SG+pembrolizumab                                                          | Patients with mUC that progressed after PCT                                                      | ORR                                           | SG plus pembrolizumab demonstrated a high ORR with a manageable safety profile in mUC in patients who progressed after PCT.                                                                                                                                   |

la/mUC: locally advanced or metastatic urothelial cancer; EV: Enfortumab vedotin; QoL: quality of life; OS: Overall survival; plt/gem: platinum/gemcitabine; DFS: Disease-free survival; RC: radical cystectomy; cCR: clinical complete response; CE: Cisplatin eligible; CI: cisplatin ineligible; MIUC: muscle-invasive urothelial carcinoma; PCT: platinum-based chemotherapy; HRQoL: Health-related quality of life; PFS: Progression-free survival; MIBC: muscle-invasive bladder cancer; NAC: neoadjuvant chemotherapy; ORR: objective response rate.
